1 *Changes in Chemosensory Sensation during COVID-19*

2

3 ORIGINAL CONTRIBUTION

4

5 Smell, taste and chemesthesis disorders in patients with the SARS-CoV-2  
6 Omicron variant in China

7

8 Ying Chen<sup>1,†</sup>, Yuying Chen<sup>1,†</sup>, Xiang Liu<sup>2</sup>, Chao Yan<sup>3</sup>, Laiquan Zou<sup>1,\*</sup>

9

10 <sup>1</sup> Chemical Senses and Mental Health Lab, Department of Psychology, School of Public Health,  
11 Southern Medical University, Guangzhou, Guangdong, China

12 <sup>2</sup> Department of Otolaryngology, Sun Yat-sen Memorial Hospital, Sun Yat-sen University, Guangzhou,  
13 Guangdong, China

14 <sup>3</sup> Key Laboratory of Brain Functional Genomics (MOE & STCSM), Shanghai Changning-ECNU  
15 Mental Health Center, School of Psychology and Cognitive Science, East China Normal University,  
16 Shanghai, China

17 \* Correspondence: [zoulq@smu.edu.cn](mailto:zoulq@smu.edu.cn); Tel.: +86-20-62789234

18 † These authors contributed equally to this work.

19 Main text word count: 2336 words

20

21 SUMMARY

22 **Background:** *Chemosensory disorders (including smell, taste and chemesthesis) are*  
23 *among the established symptoms of COVID-19 infection; however, new data indicate*  
24 *that the changes in chemosensory sensation caused by COVID-19 may differ among*  
25 *populations and COVID-19 variants. To date, few studies have focused on the*  
26 *influence of the SARS-CoV-2 Omicron variant on qualitative changes and quantitative*  
27 *reductions in chemosensory function in China.*

28 **Methodology:** *We conducted a cross-sectional study of patients with COVID-19*  
29 *caused by the Omicron variant, to investigate the prevalence of chemosensory*  
30 *disorders and chemosensory function before and during infection, using an online*  
31 *questionnaire.*

32 **Results:** *A total of 1245 patients with COVID-19 completed the survey. The*  
33 *prevalence rates of smell, taste, and chemesthesis disorders were 69.2%, 67.7%, and*  
34 *31.4%, respectively. Our data indicate that sex, age, smoking, and COVID-19-related*  
35 *symptoms, such as lack of appetite, dyspnea, and fatigue, may be associated with*  
36 *chemosensory disorders during COVID-19.*

37 **Conclusions:** *Self-rating of chemosensory function revealed that patients experienced*  
38 *a general decline in smell, taste, and chemesthesis function. Further longitudinal*  
39 *research studies are needed to generate additional data based on objective*  
40 *assessment and investigate the factors influencing chemosensory function in COVID-*  
41 *19.*

42

43 *Key words: chemosensory, COVID-19, cross-sectional studies, Omicron, prevalence*

44

45 INTRODUCTION

46 Coronavirus disease 2019 (COVID-19) was first detected in Wuhan in December  
47 2019, and rapidly spread throughout more than 80 countries<sup>(1,2)</sup>. Information from the  
48 World Health Organization shows that the number of confirmed COVID-19 cases was  
49 756,411,740 by 16 February, 2023 (<https://covid19.who.int>). There are reports that  
50 chemosensory disorders are important symptoms of COVID-19 infection<sup>(3-5)</sup>. Studies  
51 from the United States, Europe, Malaysia, and Singapore demonstrated that 12%–

52 88% of COVID-19-infected patients have olfactory and taste disorders<sup>(4,6-8)</sup>, while  
53 studies from China reported that 5%–25% of patients have smell and/or taste disorder  
54<sup>(9,10)</sup>. The Omicron variant of SARS-CoV-2 was first detected in South Africa in  
55 November 2021, and became the main epidemic strain in the world by 15 January  
56 2022<sup>(11,12)</sup>. Some studies have found that the Omicron variant causes less smell and  
57 taste dysfunction than non-Omicron SARS-CoV-2<sup>(13-15)</sup>. Further, a meta-analysis  
58 found that the prevalence rates of olfactory dysfunction caused by the Omicron  
59 variant are 8%–17% and 2%–17% the in UK and USA, respectively<sup>(15)</sup>.

60 In China, the prevalence of olfactory dysfunction caused by the Omicron variant is  
61 reported as 0–9%<sup>(16-20)</sup>; however, the sample sizes of studies to date have been  
62 relatively small and researchers have focused on patient characteristics and clinical  
63 symptoms, with insufficient discussion of chemosensory changes.

64 Chemosensory sensation (including smell, taste, and chemesthesis) have important  
65 roles in sensing potential threats, such as toxins, bacteria, and chemical irritants<sup>(21)</sup>,  
66 but most relevant studies have focused solely on smell and taste, and ignored  
67 chemesthesis, which is defined as detection of burning, cooling, or tingling in the  
68 mouth<sup>(5,21)</sup>. Since these three systems are independent sensory systems, with distinct  
69 peripheral and central neural mechanisms<sup>(22)</sup>, it is necessary to explore the influence  
70 of COVID-19 on these three senses separately. Further, chemosensory disturbances  
71 can result in qualitative changes or quantitative reductions in smell or taste, associated  
72 with different mechanisms. Qualitative changes include parosmia (things smell  
73 different from usual), phantosmia (hallucination of olfactory senses), smell  
74 fluctuation, parageusia (distorted taste sensations) and phantogeusia (hallucination of  
75 gustatory senses). Quantitative reductions include anosmia (complete loss of  
76 olfaction), hyposmia (partial loss of olfaction), ageusia (loss of all or specific  
77 gustatory senses) and hypogeusia (reduced ability to taste things)<sup>(23,24)</sup>. Previous  
78 studies have generally explored changes or reductions of smell and taste, but have  
79 rarely classified patient conditions according to the qualitative of the disorders.

80 There is a pressing need to conduct a cross-sectional study to assess the effects of  
81 Omicron on patient smell, taste, and chemesthesis in China. The primary aim of this  
82 study was to investigate the prevalence of chemosensory disorders, as well as  
83 qualitative and quantitative changes of the chemosensory senses during Omicron  
84 infection. A secondary aim was to identify factors associated with chemosensory  
85 disorders, including sex, age, alcohol intake, chronic rhinitis, allergic rhinitis, and  
86 comorbidity or specific conditions, as well as COVID-19 related characteristics.

87

## 88 MATERIALS AND METHODS

### 89 *Participants*

90 Participants answered questions in an online survey about their sociodemographic  
91 characteristics, COVID-19 infection status, and smell, taste, and chemesthesis  
92 between 20 December 2022 and 20 January 2023. A total of 1311 patients (all aged  $\geq$   
93 18 years) recovered from COVID-19 were invited to participate in the survey.  
94 Participants who did not answer all of the questions or failed to pass the lie test were  
95 excluded. The final sample consisted of 1245 participants: 983 women (79.0%) and  
96 262 men (21.0%), with a mean  $\pm$  standard deviation (SD) age of  $25.45 \pm 6.57$  years  
97 old. As this was a cross-sectional study, a 0.95 power estimate, an effect size of 0.3,  
98 and an  $\alpha$  value of 0.05 were used to calculate the necessary sample size in the  
99 G\*Power program<sup>(25)</sup>. The sample size in our study was far larger than the result  
100 proposed by the G\*Power program. All participants read an informed consent form  
101 and agreed to the use of their data for research. This study received ethics approval

102 from the Ethics Committee of Southern Medical University.

103

#### 104 *Data collection*

105 A self-administered questionnaire was used to survey patients who had recovered  
106 from COVID-19 in China. The questionnaire was adapted from existing online  
107 questionnaires developed by the Global Consortium for Chemosensory Research  
108 (GCCR)<sup>(5)</sup>. The GCCR core questionnaire has been implemented in 10 languages as  
109 of April 18, 2020, and used or adapted in many other research studies<sup>(4,26,27)</sup>. Data  
110 collected included demographic information, COVID-19-related characteristics, and  
111 patient chemosensory situations, before and during infection. To study the sense of  
112 smell and taste in further detail, smell situation options included anosmia, hyposmia,  
113 parosmia, phantosmia, and smell fluctuation, and taste situation options included  
114 ageusia, hypogeusia, parageusia, and phantogeusia<sup>(5,24)</sup>.

115

#### 116 *Statistical analysis*

117 Associations between categorical variables were tested using the Chi-Square test.  
118 Self-ratings of smell, taste, and chemesthesis before and during COVID-19 diagnosis  
119 were evaluated using the Wilcoxon matched pairs signed-rank test. Statistical  
120 significance was set at  $p < 0.05$  and all reported  $p$  values are two-tailed. All statistical  
121 analyses were performed using IBM SPSS Statistics (SPSS, version 22).

122

## 123 RESULTS

### 124 *General prevalence*

125 Of 1245 patients infected with COVID-19, 69.2% (861/1245) reported having smell  
126 disorder, 67.7% (843/1245) reported having taste disorder, and 31.4% (391/1245)  
127 reported chemesthesis disorder (Table 1); the prevalence rates of specific types of  
128 smell and taste disorder are also shown in Table 1. Among patients who experienced  
129 anosmia or hyposmia ( $n = 819$ ), only 12.3% (101/819) reported that the anosmia or  
130 hyposmia was completely caused by nasal congestion. Further, 56.9% (708/1245) of  
131 patients reported loss of both smell and taste, 12.3% (153/1245) reported loss of smell  
132 only, and 10.8% (135/1245) reported loss of taste only.

133

### 134 *Smell disorder*

135 The data presented in Table 2 show that there was a statistically significant difference  
136 in smoking status between patients with and without smell disorder ( $p < 0.05$ ); where  
137 smell disorder was significantly more common among patients who were current or  
138 former smokers ( $p < 0.05$ ). No statistically significant differences in other  
139 demographic characteristics, including sex, age group, alcohol intake, chronic rhinitis,  
140 allergic rhinitis, and comorbidity or special condition, were found between patients  
141 with and without smell disorder (all  $p > 0.05$ ). Significant differences in rehabilitation  
142 status, COVID-19-related symptoms (lack of appetite, dry and sore throat, myalgia,  
143 stuffy/running nose, dyspnea and fatigue), and COVID-19 vaccination status, were  
144 also observed between patients with and without smell disorder (all  $p < 0.05$ ). Chi-  
145 square analysis indicated that patients with symptoms including lack of appetite, dry  
146 and sore throat, myalgia, stuffy/running nose, dyspnea, and fatigue, were prone to  
147 having smell disorder. Further, patients who did not undergo COVID-19 vaccination  
148 were more likely to experience smell disorder ( $p < 0.05$ ). Associations between  
149 specific types of smell disorder (anosmia, hyposmia, parosmia, phantosmia, and  
150 olfactory fluctuation) and demographic/COVID-19-related characteristics are  
151 presented in the supplemental material (Table S1–S5).

152 Only 4.8% (60/1245) of patients reported parosmia, while 7.9% (98/1245) reported  
153 phantosmia. Pleasantness rating score on 100-point scale of the distorted smell caused  
154 by parosmia was  $25.72 \pm 24.81$  (Mean  $\pm$  SD), and that of phantom smells was  $26.74 \pm$   
155  $25.98$  (Mean  $\pm$  SD). Parosmic individuals mostly reported smells of food (e.g., meat,  
156 rice, or soup) or other daily necessities (e.g., toothpaste, shampoo, or liquid detergent)  
157 that became roasted, burnt, or spoiled (e.g., “The smell of chicken soup turned to  
158 burning”). In phantomic individuals, the most frequently reported phantom smells  
159 were smoky, burnt, and rotten.

160 Patients rated their smell function before and during COVID-19 on a 100-point scale.  
161 Compared to scores before COVID-19 ( $88.53 \pm 13.24$ , Mean  $\pm$  SD), those during  
162 COVID-19 ( $52.38 \pm 32.83$ , Mean  $\pm$  SD) were significantly lower ( $t = 38.386$ ,  $p <$   
163  $0.001$ ) (Figure 1).

164

#### 165 *Taste disorder*

166 There were no statistically significant differences in demographic characteristics, such  
167 as sex, age group, and smoking/alcohol intake, between patients with and without  
168 taste disorder (all  $p > 0.05$ , Table 3). Patients with COVID-19-related symptoms, such  
169 as lack of appetite, dry and sore throat, myalgia, headache, diarrhea,  
170 cough/expectoration, stuffy/running nose, dyspnea, and fatigue had a significant  
171 chance of experiencing taste disorder (all  $p < 0.05$ ). Associations between specific  
172 types of taste disorder (ageusia, hypogeusia, parageusia, phantogeusia) and  
173 demographic/COVID-19-related characteristics are detailed in the supplemental  
174 material (Table S6–S9). Additionally, of patients with total loss or decrease of  
175 specific taste ( $n = 597$ ), 36.9% (220/597) reported total loss or decrease in the taste of  
176 sour, 45.9% (274/597) of sweet, 20.1% (120/597) of bitter, 51.4% (307/597) of salty,  
177 and 71.9% (429/597) of umami.

178 Parageusia was described in 22.7% (282/1245) of patients, while phantogeusia was  
179 identified in 26.7% (333/1245) of patients. Pleasantness rating score on 100-point  
180 scale of the distorted gustatory sense caused by parosmia was  $19.80 \pm 21.33$  (Mean  $\pm$   
181 SD), while that for gustatory hallucination was  $24.97 \pm 34.38$  (Mean  $\pm$  SD). Most  
182 patients with parageusia described that the flavors of foods, such as orange, meat, or  
183 candy, became bitter (e.g., “The rice has turned bitter”). Patients with phantogeusia  
184 most frequently reported a constant bitter flavor, without anything in mouth.

185 Similar to smell, patients rated their taste function before and during COVID-19. The  
186 score during COVID-19 ( $58.78 \pm 29.74$ , Mean  $\pm$  SD) was significantly lower than that  
187 before COVID-19 ( $90.13 \pm 11.60$ , Mean  $\pm$  SD) ( $t = 37.173$ ,  $p < 0.001$ ).

188

#### 189 *Chemesthesis disorder*

190 No significant differences in demographic characteristics, including sex, age group,  
191 smoking and alcohol intake, chronic rhinitis, allergic rhinitis, and any comorbidity or  
192 special condition, were found between patients with and without chemesthesis  
193 disorder (all  $p > 0.05$ , Table 4). Significant differences in COVID-19-related  
194 symptoms (lack of appetite, dyspnea, and fatigue) were detected between patients  
195 with and without chemesthesis disorder (all  $p < 0.05$ ).

196 Patients also rated their chemesthesis function before and during COVID-19. The  
197 score during COVID-19 ( $71.82 \pm 26.48$ , Mean  $\pm$  SD) was also significantly lower  
198 than that before COVID-19 ( $88.50 \pm 15.83$ , Mean  $\pm$  SD) ( $t = 24.700$ ,  $p < 0.001$ ).

199

## 200 DISCUSSION

201 In the current study, we found that the prevalence rates of smell, taste, and

202 chemesthesis disorder in 1245 patients with COVID-19 during the period of Omicron  
203 variant dominance were 69.2%, 67.7%, and 31.4%, respectively. Previous studies  
204 reported prevalence rates of olfactory dysfunction ranging from 3.2% to 98.3% and of  
205 taste dysfunction ranging from 5.6% to 62.7%<sup>(28,29)</sup>. Previous research has found that  
206 the reported prevalence of smell, taste, and chemesthesis disorder varies according to  
207 differences in population, assessment method, and virus strain<sup>(28)</sup>. A meta-analysis  
208 based on data from 24 studies, including over 8400 participants from 13 countries,  
209 found the pooled prevalence rates of patients with smell and taste dysfunction were  
210 41.0% and 38.2%, respectively<sup>(29)</sup>. Another meta-analysis involving 18 studies  
211 showed that the prevalence of alteration of the sense of smell or taste was 47%<sup>(30)</sup>.  
212 Importantly, recent studies have focused primarily on quantitative changes in smell  
213 and taste, while qualitative changes of smell and taste were not addressed<sup>(29,31–33)</sup>;  
214 however, we included five types of smell disorder (anosmia, hyposmia, parosmia,  
215 phantosmia and olfactory fluctuation), and four types of taste disorder (ageusia,  
216 hypogeusia, parageusia, phantogeusia) in our study. The prevalence of anosmia in our  
217 study was 23.3%, that of hyposmia was 42.5%, ageusia was 19.0%, and hypogeusia  
218 was 40.1%. Studies have also found that the prevalence of smell and taste disorder  
219 decreased during the period of Omicron variant dominance, but remained more than  
220 30%, similar to our findings<sup>(28,34)</sup>.

221 Males are reported to be more prone to loss of smell and taste senses than females<sup>(35)</sup>;  
222 however, our data demonstrate that females were more prone to complete loss of  
223 olfaction, similar to the findings of Lechien et al.<sup>(6,8)</sup>. In terms of taste loss, we did  
224 not detect significant differences between the sexes, similar to Al-Rawi et al.<sup>(3,36)</sup>.  
225 Further, Al-Rawi et al. found more significant smell and taste loss among individuals  
226 in their late 30s<sup>(3)</sup>, consistent with our finding that patients aged 30–39 years are more  
227 prone to anosmia and ageusia. Previous research showed that smokers are more  
228 vulnerable to anosmia and ageusia<sup>(35)</sup>; however, we detected no significant  
229 differences between smokers and non-smokers in terms of anosmia and ageusia in our  
230 study. Interestingly, we found that smoking had adverse effects on smell disorders in  
231 general.

232 We also found that some COVID-19 related symptoms, such as lack of appetite,  
233 dyspnea, and fatigue, were associated with chemosensory disorder rates. Associations  
234 of these factors with chemosensory disorders have been reported in previous research  
235<sup>(7,8)</sup>; however, whether they are risk factors for chemosensory disorders requires  
236 further study.

237 In the current study, we report the prevalence, quality, and quantity of chemosensory  
238 changes in patients infected with the Omicron variant in China. Patients often confuse  
239 chemesthesis with smell and taste when self-reporting, thus our survey included an  
240 expanded section relating to chemesthesis, with the aim of better distinguishing the  
241 influences of COVID-19 infection on smell, taste and chemesthesis. We also made  
242 detailed distinctions among the quality and quantity of changes in smell and taste, and  
243 found that these changes differed in the COVID-19 infected population, which may  
244 provide reference data for the follow-up research on the mechanism underlying  
245 COVID-19 influence on smell and taste. Moreover, we expanded the Chinese version  
246 of the GCCR core questionnaire, to provide reference data for future domestic  
247 research.

248 Our study also had several limitations. First, the participants were mostly from the  
249 southern areas of China. Second, the collection of the data for our study was based on  
250 self-report, which may lead to confirmation bias of chemosensory disorders.  
251 Additional objective assessment of chemosensory disorders is needed in future

252 studies. Third, our study was cross-sectional, and longitudinal studies are needed to  
253 determine the direction of associations among variables in our study.  
254 In conclusion, the current study found that the prevalence rates of smell, taste, and  
255 chemesthesis disorder in 1245 patients with COVID-19 during the period of Omicron  
256 variant dominance were 69.2%, 67.7%, and 31.4%, respectively. Patients experienced  
257 a general decline in the function of smell, taste, and chemesthesis. Sex, age, smoking,  
258 and COVID-19-related symptoms, such as lack of appetite, dyspnea, and fatigue, may  
259 be associated with chemosensory disorders during COVID-19. The present study  
260 contributes to existing knowledge of chemosensory disorders in COVID-19 by  
261 providing Chinese data collected during Omicron variant dominance.

262

#### 263 ACKNOWLEDGEMENTS

264 We thank all the participants who participated in our study.

265

#### 266 AUTHORSHIP CONTRIBUTION

267 Conceptualization, Laiquan Zou; formal analysis, Ying Chen, Yuying Chen, and  
268 Laiquan Zou; investigation, Ying Chen, Yuying Chen, Xiang Liu, Chao Yan, and  
269 Laiquan Zou; writing—original draft, Ying Chen, Yuying Chen, and Laiquan Zou;  
270 writing—review & editing, Xiang Liu, Chao Yan, and Laiquan Zou. All authors have  
271 read and agreed to the published version of the manuscript.

272

#### 273 CONFLICT OF INTEREST

274 The authors declare that they have no competing interests.

275

#### 276 FUNDING

277 None.

278

#### 279 REFERENCES

280

- 281 1. Zhu N, Zhang D, Wang W, et al. A Novel Coronavirus from Patients with  
282 Pneumonia in China, 2019. *N Engl J Med.* 2020;382(8):727–33.
- 283 2. Guan W, Ni Z, Hu Y, et al. Clinical Characteristics of Coronavirus Disease  
284 2019 in China. *N Engl J Med.* 2020;382(18):1708–20.
- 285 3. Al-Rawi NH, Sammouda AR, AlRahin EA, et al. Prevalence of Anosmia or  
286 Ageusia in Patients With COVID-19 Among United Arab Emirates Population.  
287 *Int Dent J.* 2022;72(2):249–56.
- 288 4. Lee S-H, Yeoh ZX, Sachlin IS, et al. Self-reported symptom study of COVID-  
289 19 chemosensory dysfunction in Malaysia. *Sci Rep.* 2022;12(1):2111.
- 290 5. Parma V, Ohla K, Veldhuizen MG, et al. More Than Smell—COVID-19 Is  
291 Associated With Severe Impairment of Smell, Taste, and Chemesthesis. *Chem*  
292 *Senses.* 2020;45(7):609–22.
- 293 6. Lechien JR, Chiesa-Estomba CM, De Siati DR, et al. Olfactory and gustatory  
294 dysfunctions as a clinical presentation of mild-to-moderate forms of the  
295 coronavirus disease (COVID-19): a multicenter European study. *Eur Arch*  
296 *Otorhinolaryngol.* 2020;277(8):2251–61.
- 297 7. Menni C, Valdes AM, Freidin MB, et al. Real-time tracking of self-reported  
298 symptoms to predict potential COVID-19. *Nat Med.* 2020;26(7):1037–40.
- 299 8. Tham AC, Thein T-L, Lee CS, et al. Olfactory taste disorder as a presenting  
300 symptom of COVID-19: a large single-center Singapore study. *Eur Arch*  
301 *Otorhinolaryngol.* 2021;278(6):1853–62.

- 302 9. Song J, Deng Y, Wang H, et al. Self-reported Taste and Smell Disorders in  
303 Patients with COVID-19: Distinct Features in China. 2021;
- 304 10. Mao L, Jin H, Wang M, et al. Neurologic Manifestations of Hospitalized  
305 Patients With Coronavirus Disease 2019 in Wuhan, China. *JAMA Neurol.*  
306 2020;77(6):683.
- 307 11. Menni C, Valdes AM, Polidori L, et al. Symptom prevalence, duration, and  
308 risk of hospital admission in individuals infected with SARS-CoV-2 during  
309 periods of omicron and delta variant dominance: a prospective observational  
310 study from the ZOE COVID Study. *The Lancet.* 2022;399(10335):1618–24.
- 311 12. Hu J, Peng P, Cao X, et al. Increased immune escape of the new SARS-CoV-2  
312 variant of concern Omicron. *Cell Mol Immunol.* 2022;19(2):293–5.
- 313 13. Chee J, Chern B, Loh WS, Mullol J, Wang DY. Pathophysiology of SARS-  
314 CoV-2 Infection of Nasal Respiratory and Olfactory Epithelia and Its Clinical  
315 Impact. *Curr Allergy Asthma Rep.* 2023;23(2):121–31.
- 316 14. Rodriguez-Sevilla JJ, Güerri-Fernández R, Bertran Recasens B. Is There Less  
317 Alteration of Smell Sensation in Patients With Omicron SARS-CoV-2 Variant  
318 Infection? *Front Med.* 2022;9:852998.
- 319 15. von Bartheld CS, Wang L. Prevalence of Olfactory Dysfunction with the  
320 Omicron Variant of SARS-CoV-2: A Systematic Review and Meta-Analysis.  
321 *Cells.* 2023;12(3):430.
- 322 16. Li Q, Liu X, Li L, et al. Comparison of clinical characteristics between SARS-  
323 CoV-2 Omicron variant and Delta variant infections in China. *Front Med.*  
324 2022;9:944909.
- 325 17. Liang Y, Mao X, Kuang M, et al. Interleukin-6 affects the severity of olfactory  
326 disorder: a cross-sectional survey of 148 patients who recovered from  
327 Omicron infection using the Sniffin' Sticks test in Tianjin, China. *Int J Infect*  
328 *Dis.* 2022;123:17–24.
- 329 18. Yang W, Yang S, Wang L, et al. Clinical characteristics of 310 SARS-CoV-2  
330 Omicron variant patients and comparison with Delta and Beta variant patients  
331 in China. *Viol Sin.* 2022;37(5):704–15.
- 332 19. Zhang H, Chen W, Ye X, et al. Clinical characteristics of patients infected with  
333 novel coronavirus wild strain, Delta variant strain and Omicron variant strain  
334 in Quanzhou: A real world study. *Exp Ther Med.* 2022;25(1):62.
- 335 20. Shen J, Wu L, Wang P, et al. Clinical characteristics and short-term recovery  
336 of hyposmia in hospitalized non-severe COVID-19 patients with Omicron  
337 variant in Shanghai, China. *Front Med.* 2022;9:1038938.
- 338 21. Green BG. Chemesthesis and the Chemical Senses as Components of a  
339 “Chemofensor Complex.” *Chem Senses.* 2012;37(3):201–6.
- 340 22. Speth MM, Singer-Cornelius T, Oberle M, Gengler I, Brockmeier SJ,  
341 Sedaghat AR. Olfactory Dysfunction and Sinonasal Symptomatology in  
342 COVID-19: Prevalence, Severity, Timing, and Associated Characteristics.  
343 *Otolaryngol Neck Surg.* 2020;163(1):114–20.
- 344 23. Iannilli E, Leopold DA, Hornung DE, Hummel T. Advances in Understanding  
345 Parosmia: An fMRI Study. *ORL.* 2019;81(4):185–92.
- 346 24. Epstein JB, Smutzer G, Doty RL. Understanding the impact of taste changes in  
347 oncology care. *Support Care Cancer.* 2016;24(4):1917–31.
- 348 25. Faul F, Erdfelder E, Lang A-G, Buchner A. G\*Power 3: A flexible statistical  
349 power analysis program for the social, behavioral, and biomedical sciences.  
350 *Behav Res Methods.* 2007;39(2):175–91.
- 351 26. Cecchetto C, Di Pizio A, Genovese F, et al. Assessing the extent and timing of

- 352 chemosensory impairments during COVID-19 pandemic. *Sci Rep.*  
353 2021;11(1):17504.
- 354 27. Albayay J, Fontana L, Parma V, Zampini M. Chemosensory Dysfunction in  
355 Long-Term COVID-19 Assessed by Self-Reported and Direct Psychophysical  
356 Methods. *Life.* 2022;12(10):1487.
- 357 28. Song J, Jing Q, Zhu E, et al. Alterations in smell or taste in individuals  
358 infected with SARS-CoV-2 during periods of Omicron variant dominance. *Int*  
359 *J Infect Dis.* 2023;128:278–84.
- 360 29. Agyeman AA, Chin KL, Landersdorfer CB, Liew D, Ofori-Asenso R. Smell  
361 and Taste Dysfunction in Patients With COVID-19: A Systematic Review and  
362 Meta-analysis. *Mayo Clin Proc.* 2020;95(8):1621–31.
- 363 30. Borsetto D, Hopkins C, Philips V, et al. Self-reported alteration of sense of  
364 smell or taste in patients with COVID-19: a systematic review and meta-  
365 analysis on 3563 patients. *Rhinology.* 2020;58(5):430–6.
- 366 31. Luers JC, Rokohl AC, Loreck N, et al. Olfactory and Gustatory Dysfunction in  
367 Coronavirus Disease 2019 (COVID-19). *Clin Infect Dis Off Publ Infect Dis*  
368 *Soc Am.* 2020;71(16):2262–4.
- 369 32. Mercante G, Ferreli F, De Virgilio A, et al. Prevalence of Taste and Smell  
370 Dysfunction in Coronavirus Disease 2019. *JAMA Otolaryngol-- Head Neck*  
371 *Surg.* 2020;146(8):1–6.
- 372 33. Pellegrino R, Mainland JD, Kelly CE, Parker JK, Hummel T. Prevalence and  
373 correlates of parosmia and phantosmia among smell disorders. *Chem Senses.*  
374 2021;46:bjab046.
- 375 34. Boscolo Rizzo P, Tirelli G, Meloni P, et al. Coronavirus disease 2019  
376 (COVID-19)-related smell and taste impairment with widespread diffusion  
377 of severe acute respiratory syndrome-coronavirus 2 (SARS-CoV-2)  
378 Omicron variant. *Int Forum Allergy Rhinol.* 2022;12(10):1273–81.
- 379 35. Al-Ani RM, Acharya D. Prevalence of Anosmia and Ageusia in Patients with  
380 COVID-19 at a Primary Health Center, Doha, Qatar. *Indian J Otolaryngol*  
381 *Head Neck Surg.* 2022;74(S2):2703–9.
- 382 36. Moein ST, Hashemian SM, Mansourafshar B, Khorram-Tousi A, Tabarsi P,  
383 Doty RL. Smell dysfunction: a biomarker for COVID-19. *Int Forum Allergy*  
384 *Rhinol.* 2020;10(8):944–50.

385  
386 CORRESPONDING AUTHOR

387 Laiquan Zou

388 Chemical Senses and Mental Health Lab, Department of Psychology, School of  
389 Public Health, Southern Medical University, Guangzhou, Guangdong, China

390 Tel.: +86-20-62789234

391 zoulq@smu.edu.cn;

392



393 FIGURES

394

395 **Figure 1** The results of self-rating of smell, taste, and chemesthesis function

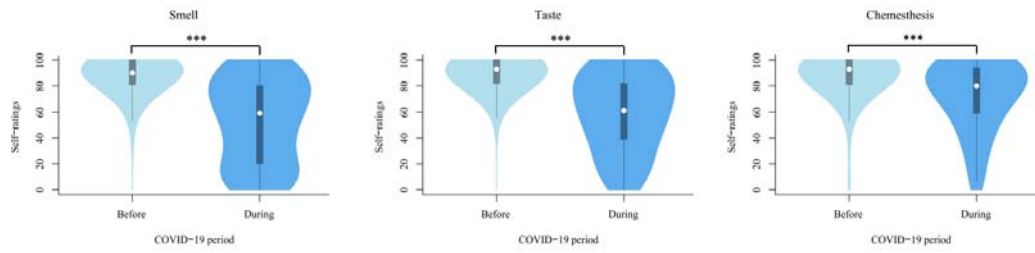

396

397

398

399

\*\*\*  $p < 0.001$ .

400 TABLES

401 **Table 1 The prevalence of smell, taste, and chemesthesis disorders among**  
402 **patients with COVID-19**

| Variable              | n   | Total prevalence (N = 1245) | Prevalence in people with smell/taste/chemesthesis disorder |
|-----------------------|-----|-----------------------------|-------------------------------------------------------------|
| Smell disorder*       | 861 | 69.2%                       | \                                                           |
| Anosmia               | 290 | 23.3%                       | 33.7%                                                       |
| Hyposmia              | 529 | 42.5%                       | 61.4%                                                       |
| Parosmia              | 60  | 4.8%                        | 7.0%                                                        |
| Phantosmia            | 98  | 7.9%                        | 11.4%                                                       |
| Smell fluctuation     | 438 | 35.2%                       | 50.9%                                                       |
| Taste disorder*       | 843 | 67.7%                       | \                                                           |
| Ageusia               | 236 | 19.0%                       | 28.0%                                                       |
| Hypogeusia            | 499 | 40.1%                       | 59.2%                                                       |
| Parageusia            | 282 | 22.7%                       | 33.5%                                                       |
| Phantogeusia          | 333 | 26.7%                       | 39.5%                                                       |
| Chemesthesis disorder | 391 | 31.4%                       | \                                                           |
| Complete loss         | 35  | 2.8%                        | 9.0%                                                        |
| Partial loss          | 356 | 28.6%                       | 91.0%                                                       |

403 \*Multiple responses

404

405 **Table 2 Association between smell disorder and demographic/COVID-19-related**  
 406 **characteristics among patients**

| Variable                                                | Smell disorder (%) |              | Total (%)   | p value |
|---------------------------------------------------------|--------------------|--------------|-------------|---------|
|                                                         | Yes (n = 861)      | No (n = 384) | N = 1245    |         |
| <b>Sex</b>                                              |                    |              |             |         |
| Male                                                    | 170 (19.7)         | 92 (24.0)    | 262 (21.0)  | 0.092   |
| Female                                                  | 691 (80.3)         | 292 (76.0)   | 983 (79.0)  |         |
| <b>Age, years</b>                                       |                    |              |             |         |
| 18–29                                                   | 702 (81.5)         | 327 (85.2)   | 1029 (82.7) | 0.204   |
| 30–39                                                   | 116 (13.5)         | 38 (9.9)     | 154 (12.4)  |         |
| 40–49                                                   | 30 (3.5)           | 16 (4.2)     | 46 (3.7)    |         |
| ≥ 50                                                    | 13 (1.5)           | 3 (0.8)      | 16 (1.3)    |         |
| <b>Smoking</b>                                          |                    |              |             |         |
| Current                                                 | 32 (3.7)           | 5 (1.3)      | 37 (3.0)    | 0.012   |
| Former                                                  | 38 (4.4)           | 9 (2.3)      | 47 (3.8)    |         |
| Never                                                   | 791 (91.9)         | 370 (96.4)   | 1161 (93.3) |         |
| <b>Alcohol</b>                                          |                    |              |             |         |
| Yes                                                     | 441 (51.2)         | 184 (47.9)   | 625 (50.2)  | 0.282   |
| No                                                      | 420 (48.8)         | 200 (52.1)   | 620 (49.8)  |         |
| <b>Chronic rhinitis</b>                                 |                    |              |             |         |
| Yes                                                     | 137 (15.9)         | 48 (12.5)    | 185 (14.9)  | 0.118   |
| No                                                      | 724 (84.1)         | 336 (87.5)   | 1060 (85.1) |         |
| <b>Allergic rhinitis</b>                                |                    |              |             |         |
| Yes                                                     | 208 (24.2)         | 91 (23.7)    | 299 (24.0)  | 0.861   |
| No                                                      | 653 (75.8)         | 293 (76.3)   | 946 (76.0)  |         |
| <b>Any comorbidity or special condition<sup>#</sup></b> |                    |              |             |         |
| Yes                                                     | 106 (12.3)         | 42 (10.9)    | 148 (11.9)  | 0.489   |
| No                                                      | 755 (87.7)         | 342 (89.1)   | 1097 (88.1) |         |
| <b>Method of diagnosis</b>                              |                    |              |             |         |
| PCR test                                                | 134 (15.6)         | 67 (17.4)    | 201 (16.1)  | 0.706   |
| Antigen test                                            | 459 (53.3)         | 200 (52.1)   | 659 (52.9)  |         |
| Symptoms                                                | 268 (31.1)         | 117 (30.5)   | 385 (30.9)  |         |
| <b>Rehabilitation status</b>                            |                    |              |             |         |
| Complete                                                | 283 (32.9)         | 167 (43.5)   | 450 (36.1)  | < 0.001 |
| Partial                                                 | 578 (67.1)         | 217 (56.5)   | 795 (63.9)  |         |
| <b>Symptoms<sup>*</sup></b>                             |                    |              |             |         |
| Fever                                                   | 818 (95.0)         | 358 (93.2)   | 1176 (94.5) | 0.206   |
| Lack of appetite                                        | 547 (63.5)         | 168 (43.8)   | 715 (57.4)  | < 0.001 |
| Dry and sore throat                                     | 692 (80.4)         | 284 (74.0)   | 976 (78.4)  | 0.011   |
| Myalgia                                                 | 604 (70.2)         | 240 (62.5)   | 844 (67.8)  | 0.008   |
| Headache                                                | 598 (69.5)         | 256 (66.7)   | 854 (68.6)  | 0.328   |
| Diarrhea                                                | 191 (22.2)         | 71 (18.5)    | 262 (21.0)  | 0.140   |
| Cough/expectoration                                     | 747 (86.8)         | 321 (83.6)   | 1068 (85.8) | 0.140   |
| Stuffy/running nose                                     | 704 (81.8)         | 281 (73.2)   | 985 (79.1)  | 0.001   |
| Dyspnea                                                 | 158 (18.4)         | 43 (11.2)    | 201 (16.1)  | 0.002   |
| Fatigue                                                 | 602 (69.9)         | 232 (60.4)   | 834 (67.0)  | 0.001   |

COVID-19 vaccination

|                |            |            |             |       |
|----------------|------------|------------|-------------|-------|
| Yes (n = 1208) | 828 (96.2) | 380 (99.0) | 1208 (97.0) | 0.007 |
| No (n = 37)    | 33 (3.8)   | 4 (1.0)    | 37 (3.0)    |       |

---

407 #Comorbidity or special condition includes hypertension, diabetes, cardiovascular  
408 disease, cerebrovascular disease, neoplastic disease, immune deficiency, chronic  
409 kidney disease, thyroid disease, rheumatoid arthritis, spinal joint disease, bronchial  
410 asthma, mental illness, and in the third trimester of pregnancy or perinatal period.  
411 \*Multiple responses  
412

413 **Table 3 Association between taste disorder and demographic/COVID-19-related**  
 414 **characteristics among patients**

| Variable                                                | Taste disorder (%) |              | Total (%)      | p value |
|---------------------------------------------------------|--------------------|--------------|----------------|---------|
|                                                         | Yes (n = 843)      | No (n = 402) | Yes (n = 1245) |         |
| <b>Sex</b>                                              |                    |              |                |         |
| Male                                                    | 167 (19.8)         | 95 (23.6)    | 262 (21.0)     | 0.122   |
| Female                                                  | 676 (80.2)         | 307 (76.4)   | 983 (79.0)     |         |
| <b>Age, years</b>                                       |                    |              |                |         |
| 18–29                                                   | 687 (81.5)         | 342 (85.1)   | 1029 (82.7)    | 0.430   |
| 30–39                                                   | 113 (13.4)         | 41 (10.2)    | 154 (12.4)     |         |
| 40–49                                                   | 32 (3.8)           | 14 (3.5)     | 46 (3.7)       |         |
| ≥ 50                                                    | 11 (1.3)           | 5 (1.2)      | 16 (1.3)       |         |
| <b>Smoking</b>                                          |                    |              |                |         |
| Current                                                 | 27 (3.2)           | 10 (2.5)     | 37 (3.0)       | 0.194   |
| Former                                                  | 37 (4.4)           | 10 (2.5)     | 47 (3.8)       |         |
| Never                                                   | 779 (92.4)         | 382 (95.0)   | 1161 (93.3)    |         |
| <b>Alcohol</b>                                          |                    |              |                |         |
| Yes                                                     | 430 (51.0)         | 195 (48.5)   | 625 (50.2)     | 0.409   |
| No                                                      | 413 (49.0)         | 207 (51.5)   | 620 (49.8)     |         |
| <b>Chronic rhinitis</b>                                 |                    |              |                |         |
| Yes                                                     | 129 (15.3)         | 56 (13.9)    | 185 (14.9)     | 0.524   |
| No                                                      | 714 (84.7)         | 346 (86.1)   | 1060 (85.1)    |         |
| <b>Allergic rhinitis</b>                                |                    |              |                |         |
| Yes                                                     | 206 (24.4)         | 93 (23.1)    | 299 (24.0)     | 0.615   |
| No                                                      | 637 (75.6)         | 309 (76.9)   | 946 (76.0)     |         |
| <b>Any comorbidity or special condition<sup>#</sup></b> |                    |              |                |         |
| Yes                                                     | 109 (12.9)         | 39 (9.7)     | 148 (11.9)     | 0.100   |
| No                                                      | 734 (87.1)         | 363 (90.3)   | 1097 (88.1)    |         |
| <b>Method of diagnosis</b>                              |                    |              |                |         |
| PCR test                                                | 135 (16.0)         | 66 (16.4)    | 201 (16.1)     | 0.466   |
| Antigen test                                            | 438 (52.0)         | 221 (55.0)   | 659 (52.9)     |         |
| Symptoms                                                | 270 (32.0)         | 115 (28.6)   | 385 (30.9)     |         |
| <b>Rehabilitation status</b>                            |                    |              |                |         |
| Complete                                                | 292 (34.6)         | 158 (39.3)   | 450 (36.1)     | 0.109   |
| Partial                                                 | 551 (65.4)         | 244 (60.7)   | 795 (63.9)     |         |
| <b>Symptoms<sup>*</sup></b>                             |                    |              |                |         |
| Fever                                                   | 800 (94.9)         | 376 (93.5)   | 1176 (94.5)    | 0.324   |
| Lack of appetite                                        | 554 (65.7)         | 161 (40.0)   | 715 (57.4)     | < 0.001 |
| Dry and sore throat                                     | 677 (80.3)         | 299 (74.4)   | 976 (78.4)     | 0.017   |
| Myalgia                                                 | 591 (70.1)         | 253 (62.9)   | 844 (67.8)     | 0.011   |
| Headache                                                | 599 (71.1)         | 255 (63.4)   | 854 (68.6)     | 0.007   |
| Diarrhea                                                | 196 (23.3)         | 66 (16.4)    | 262 (21.0)     | 0.006   |
| Cough/expectoration                                     | 739 (87.7)         | 329 (81.8)   | 1068 (85.8)    | 0.006   |
| Stuffiness/runny nose                                   | 681 (80.8)         | 304 (75.6)   | 985 (79.1)     | 0.036   |
| Dyspnea                                                 | 158 (18.7)         | 43 (10.7)    | 201 (16.1)     | < 0.001 |
| Fatigue                                                 | 598 (70.9)         | 236 (58.7)   | 834 (67.0)     | < 0.001 |

COVID-19 vaccination

|     |            |            |             |       |
|-----|------------|------------|-------------|-------|
| Yes | 814 (96.6) | 394 (98.0) | 1208 (97.0) | 0.159 |
| No  | 29 (3.4)   | 8 (2.0)    | 37 (3.0)    |       |

---

415 #Comorbidity or special conditions included hypertension, diabetes, cardiovascular  
416 disease, cerebrovascular disease, neoplastic disease, immune deficiency, chronic  
417 kidney disease, thyroid disease, rheumatoid arthritis, spinal joint disease, bronchial  
418 asthma, mental illness, and in the third trimester of pregnancy or perinatal period.

419 \*Multiple responses.

420

421 **Table 4 Association between chemesthesis disorder and patient demographic**  
 422 **characteristics**

| Variable                                                | Chemesthesis disorder (%) |              | Total (%)      | p value |
|---------------------------------------------------------|---------------------------|--------------|----------------|---------|
|                                                         | Yes (n = 391)             | No (n = 854) | Yes (n = 1245) |         |
| <b>Sex</b>                                              |                           |              |                |         |
| Male                                                    | 70 (17.9)                 | 192 (22.5)   | 262 (21.0)     | 0.066   |
| Female                                                  | 321 (82.1)                | 662 (77.5)   | 983 (79.0)     |         |
| <b>Age, years</b>                                       |                           |              |                |         |
| 18–29                                                   | 310 (79.3)                | 719 (84.2)   | 1029 (82.7)    | 0.160   |
| 30–39                                                   | 60 (15.3)                 | 94 (11.0)    | 154 (12.4)     |         |
| 40–49                                                   | 15 (3.8)                  | 31 (3.6)     | 46 (3.7)       |         |
| ≥ 50                                                    | 6 (1.5)                   | 10 (1.2)     | 16 (1.3)       |         |
| <b>Smoking</b>                                          |                           |              |                |         |
| Current                                                 | 12 (3.1)                  | 25 (2.9)     | 37 (3.0)       | 0.914   |
| Former                                                  | 16 (4.1)                  | 31 (3.6)     | 47 (3.8)       |         |
| Never                                                   | 363 (92.8)                | 798 (93.4)   | 1161 (93.3)    |         |
| <b>Alcohol</b>                                          |                           |              |                |         |
| Yes                                                     | 203 (51.9)                | 422 (49.4)   | 625 (50.2)     | 0.412   |
| No                                                      | 188 (48.1)                | 432 (50.6)   | 620 (49.8)     |         |
| <b>Chronic rhinitis</b>                                 |                           |              |                |         |
| Yes                                                     | 62 (15.9)                 | 123 (14.4)   | 185 (14.9)     | 0.503   |
| No                                                      | 329 (84.1)                | 731 (85.6)   | 1060 (85.1)    |         |
| <b>Allergic rhinitis</b>                                |                           |              |                |         |
| Yes                                                     | 86 (22.0)                 | 213 (24.9)   | 299 (24.0)     | 0.259   |
| No                                                      | 305 (78.0)                | 641 (75.1)   | 946 (76.0)     |         |
| <b>Any comorbidity or special condition<sup>#</sup></b> |                           |              |                |         |
| Yes                                                     | 49 (12.5)                 | 99 (11.6)    | 148 (11.9)     | 0.635   |
| No                                                      | 342 (87.5)                | 755 (88.4)   | 1097 (88.1)    |         |
| <b>Method of diagnosis</b>                              |                           |              |                |         |
| PCR test                                                | 60 (15.3)                 | 141 (16.5)   | 201 (16.1)     | 0.693   |
| Antigen test                                            | 204 (52.2)                | 455 (53.3)   | 659 (52.9)     |         |
| Symptoms                                                | 127 (32.5)                | 258 (30.2)   | 385 (30.9)     |         |
| <b>Rehabilitation status</b>                            |                           |              |                |         |
| Complete                                                | 126 (32.2)                | 324 (37.9)   | 450 (36.1)     | 0.051   |
| Partial                                                 | 265 (67.8)                | 530 (62.1)   | 795 (63.9)     |         |
| <b>Symptoms<sup>*</sup></b>                             |                           |              |                |         |
| Fever                                                   | 369 (94.4)                | 807 (94.5)   | 1176 (94.5)    | 0.930   |
| Lack of appetite                                        | 261 (66.8)                | 454 (53.2)   | 715 (57.4)     | < 0.001 |
| Dry and sore throat                                     | 312 (79.8)                | 664 (77.8)   | 976 (78.4)     | 0.416   |
| Myalgia                                                 | 270 (69.1)                | 574 (67.2)   | 844 (67.8)     | 0.519   |
| Headache                                                | 266 (68.0)                | 588 (68.9)   | 854 (68.6)     | 0.772   |
| Diarrhea                                                | 84 (21.5)                 | 178 (20.8)   | 262 (21.0)     | 0.797   |
| Cough/expectoration                                     | 341 (87.2)                | 727 (85.1)   | 1068 (85.8)    | 0.329   |
| Stuffy/running nose                                     | 309 (79.0)                | 676 (79.2)   | 985 (79.1)     | 0.959   |
| Dyspnea                                                 | 87 (22.3)                 | 114 (13.3)   | 201 (16.1)     | < 0.001 |
| Fatigue                                                 | 284 (72.6)                | 550 (64.4)   | 834 (67.0)     | 0.004   |

COVID-19 vaccination

|     |            |            |             |       |
|-----|------------|------------|-------------|-------|
| Yes | 374 (95.7) | 834 (97.7) | 1208 (97.0) | 0.053 |
| No  | 17 (4.3)   | 20 (2.3)   | 37 (3.0)    |       |

---

423 #Comorbidity or special conditions included hypertension, diabetes, cardiovascular  
424 disease, cerebrovascular disease, neoplastic disease, immune deficiency, chronic  
425 kidney disease, thyroid disease, rheumatoid arthritis, spinal joint disease, bronchial  
426 asthma, mental illness, and in the third trimester of pregnancy or perinatal period.  
427 \*Multiple response.  
428
